# Supplementary material for: A Unique Saccharomyces cerevisiae × Saccharomyces uvarum Hybrid Isolated From Norwegian Farmhouse Beer: Characterization and Reconstruction
Source: PubMed Central journal article supplement (PMC6165869; doi:10.3389/fmicb.2018.02253), 2018-09-24
Supplement: Data_Sheet_1.pdf [file Data_Sheet_1.pdf]

## Supplementary Material

*A unique Saccharomyces cerevisiae × Saccharomyces uvarum hybrid isolated from Norwegian farmhouse beer: characterization and reconstruction*

Kristoffer Krogerus<sup>1,2#</sup>, Richard Priess<sup>3,4</sup>, Brian Gibson<sup>1</sup>

<sup>1</sup> VTT Technical Research Centre of Finland, Tietotie 2, P.O. Box 1000, FI-02044 VTT, Espoo, Finland

<sup>2</sup> Department of Biotechnology and Chemical Technology, Aalto University, School of Chemical Technology, Kemistintie 1, Aalto, P.O. Box 16100, FI-00076 Espoo, Finland

<sup>3</sup> Department of Molecular and Cellular Biology, University of Guelph, 50 Stone Rd. E, Guelph, ON N1G 2W1, Canada

<sup>4</sup> Escarpment Laboratories, 8 Smith Ave., Guelph, ON N1E 5Y5, Canada

# Address correspondence to Kristoffer Krogerus, [kristoffer.krogerus@gmail.com](mailto:kristoffer.krogerus@gmail.com)

DOI: 10.3389/fmicb.2018.02253

## Muri

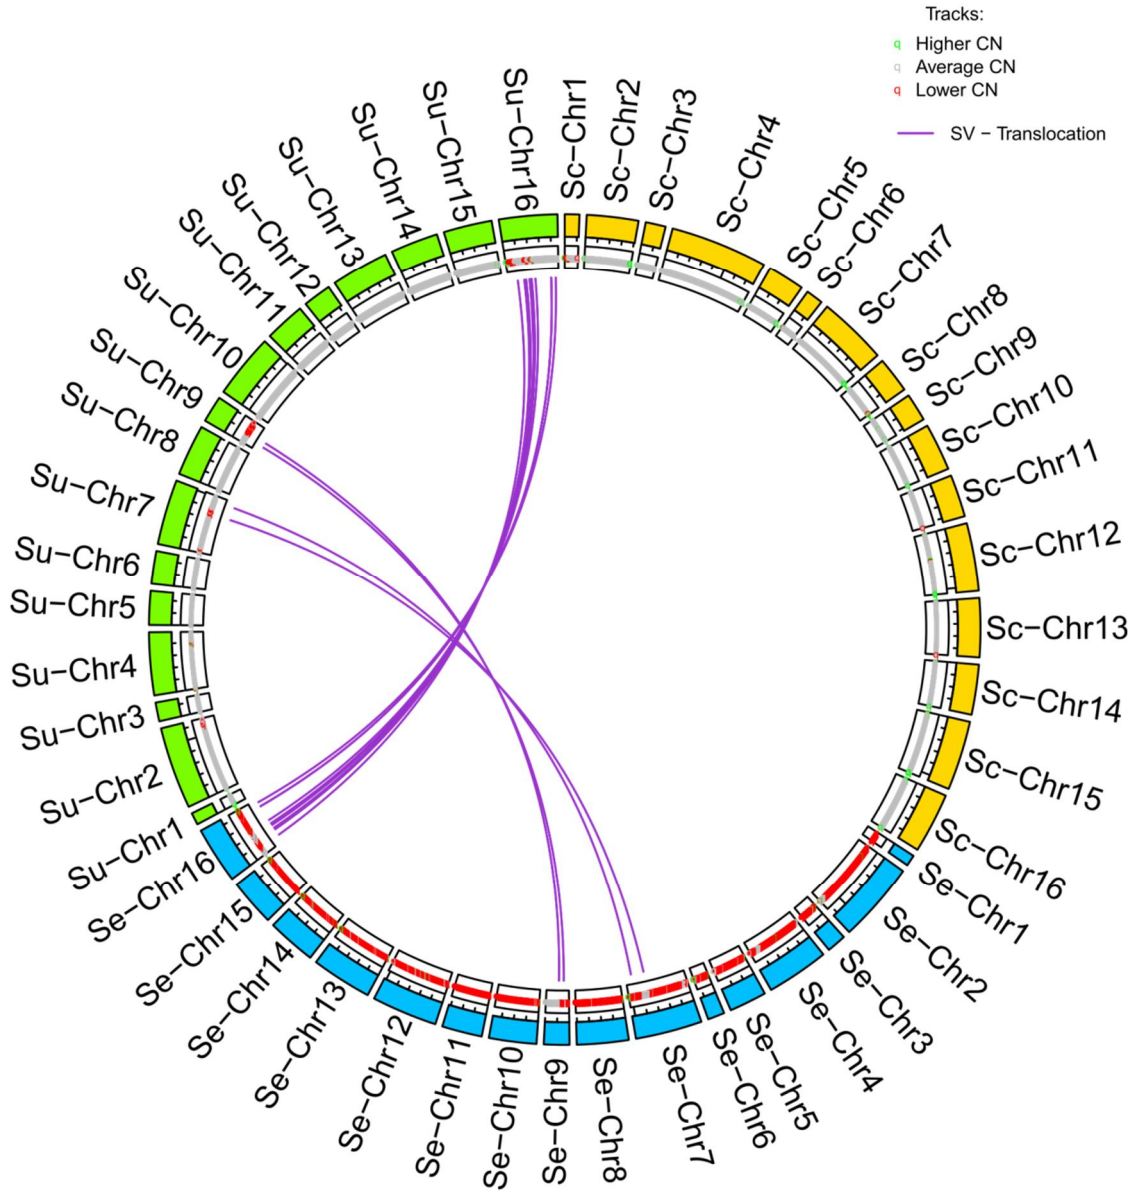

**Supplementary Figure S1 – ‘Circos-style’ plot of Muri’s sub-genomes.** The outer most track shows the chromosomes of the reference genome to which the sequencing reads were aligned (*S. cerevisiae* chromosomes in yellow, *S. eubayanus* chromosomes in blue, and *S. uvarum* chromosomes in green). The middle track shows the normalized median coverage in 10000 bp windows (green denotes coverage higher than 1.25 times the mean coverage, red denotes coverage lower than 0.75 times the mean coverage, and grey denotes coverage between 0.75 to 1.25 times the mean coverage). Ribbons between chromosomes show interchromosomal translocations detected by Manta. The translocations depict the breakpoints for introgressed regions.

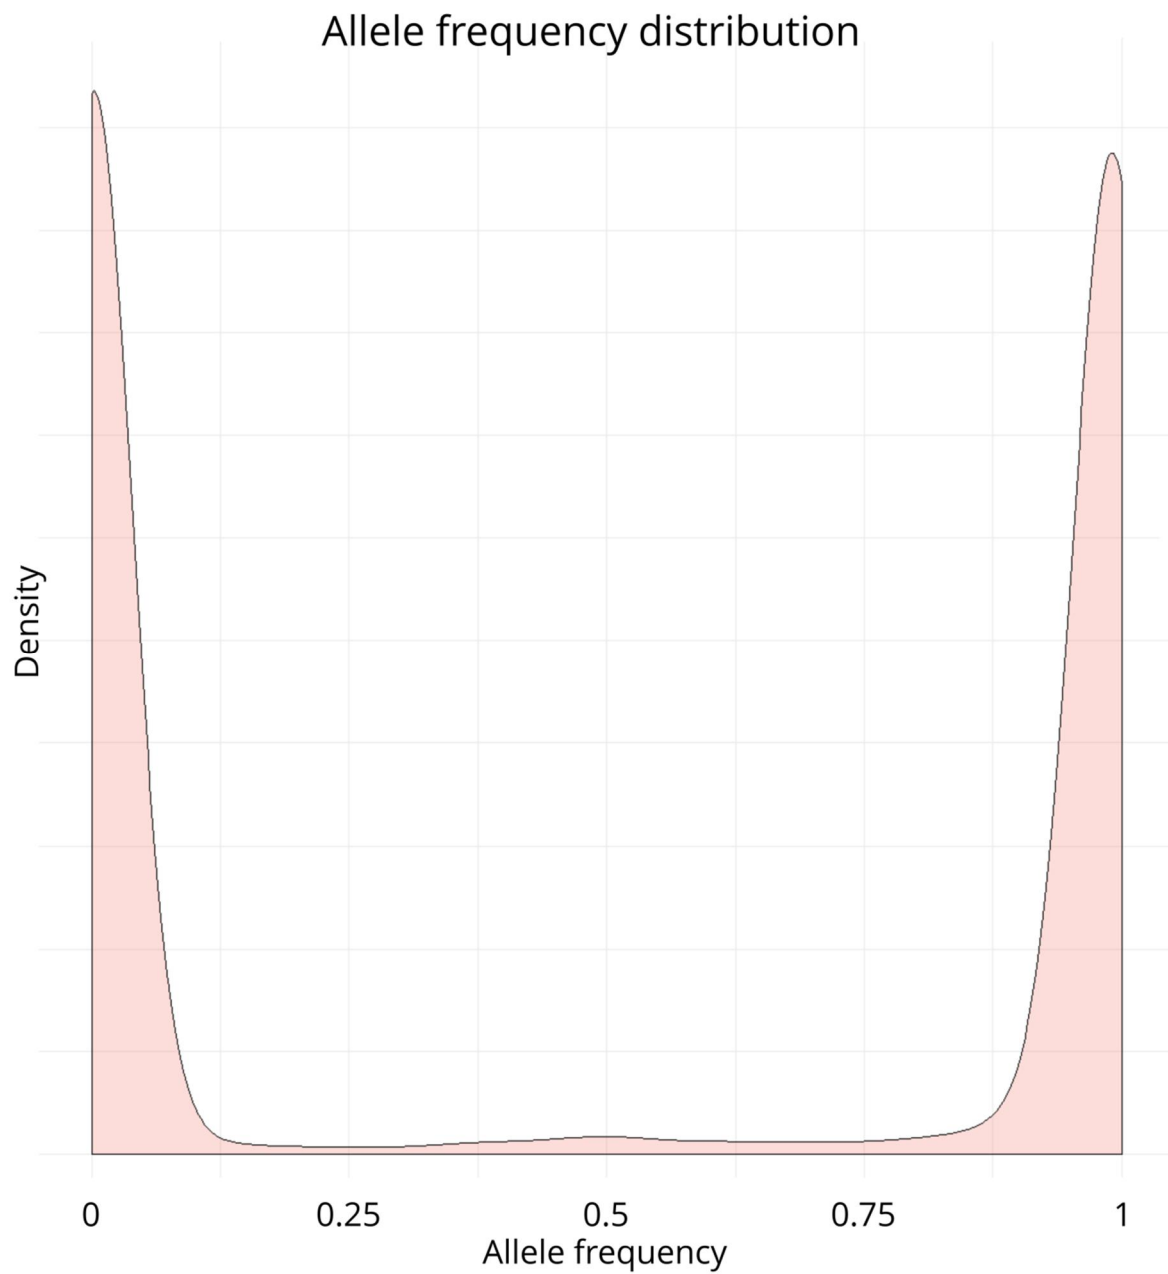

**Supplementary Figure S2 – Allele frequency distribution of the single nucleotide polymorphisms detected in the Muri hybrid. Peaks at 0 and 1 suggest a single allele at each site (haploid sub-genomes).**

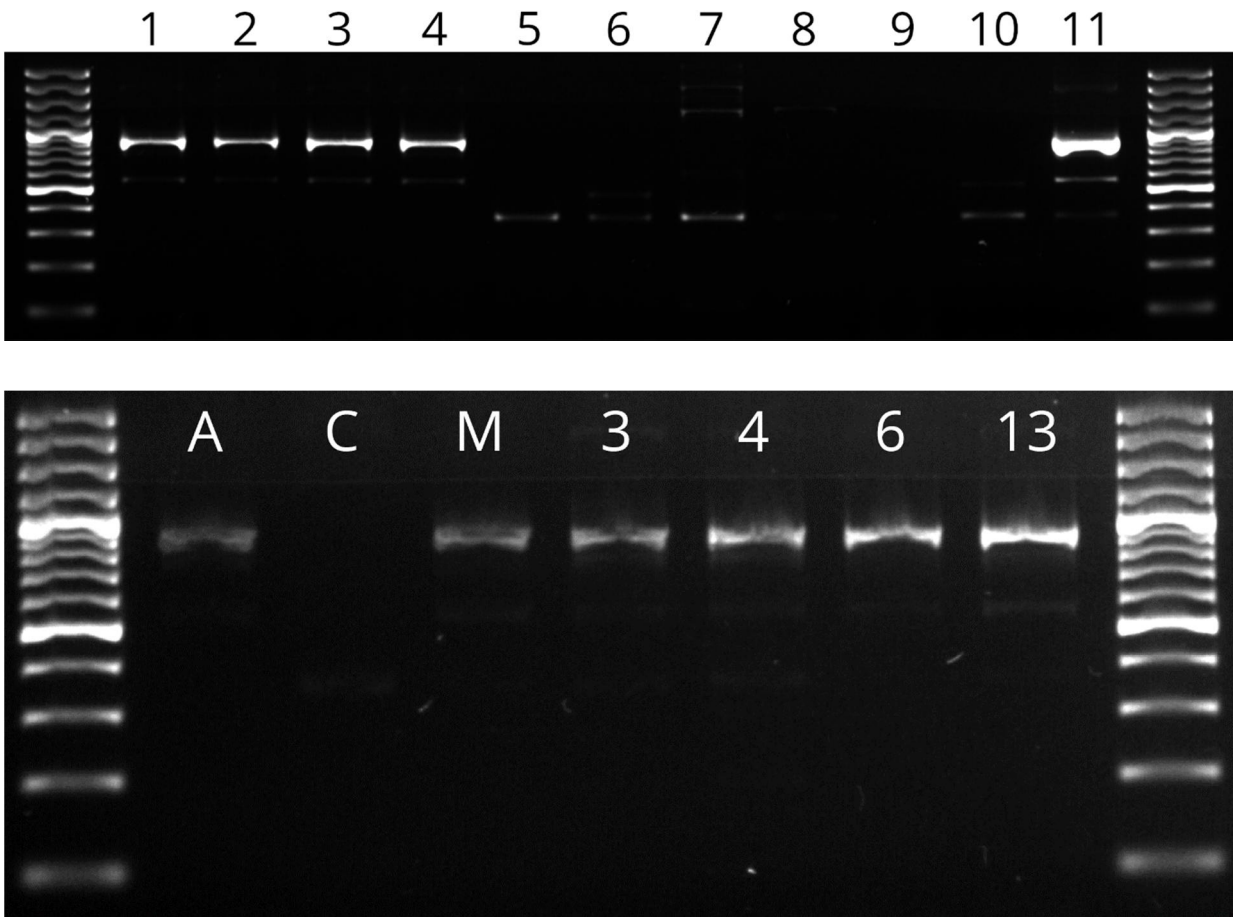

**Supplementary Figure S3 – PCR of *STA1* (amplicon size approx. 870 bp) using primers SD-5A and SD-6B (Yamauchi et al., 1998).** (A) *S. cerevisiae*, *S. uvarum*, and natural hybrid strains. The lanes are numbered as follows: 1: A240, 2: A241, 3: A242, 4: A243, 5: C992, 6: C993, 7: C995, 8: C996, 9: C997, 10: C998, 11: Muri. (B) Muri, *de novo* hybrids, and parent strains. The lanes are numbered as follows: A: A241, C: C995, M: Muri, 3: 3B, 4: 4B, 6: 6A, 13: 13C. A 100 bp ladder was used.

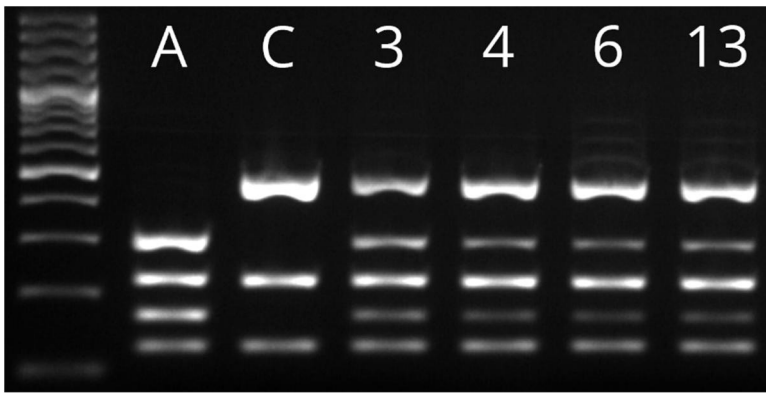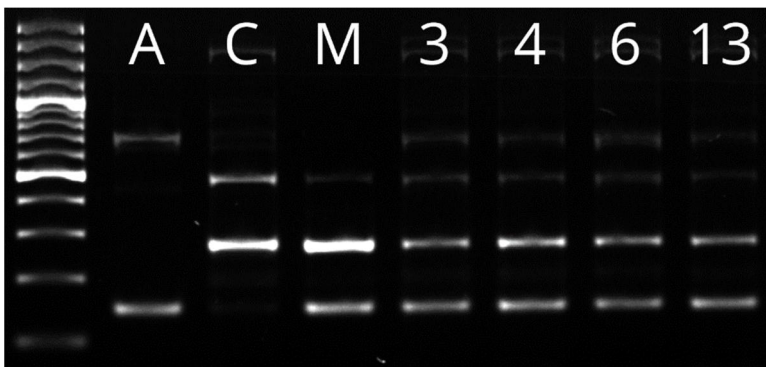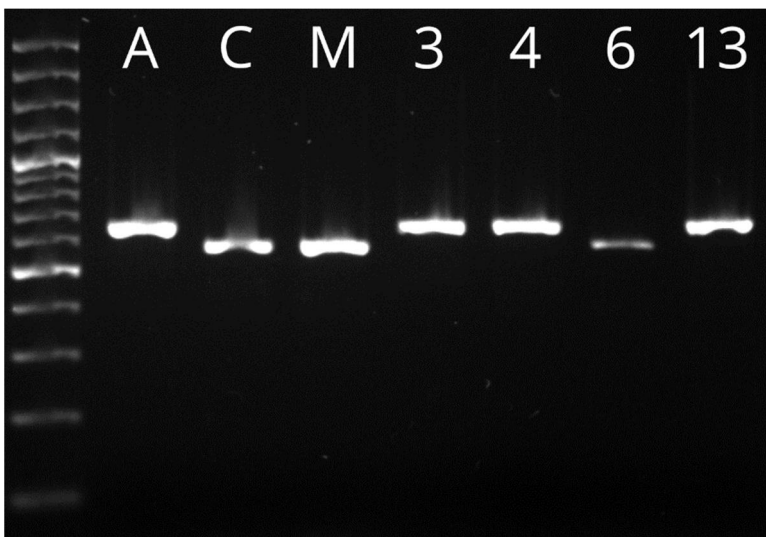

**Supplementary Figure S4 – Hybrid confirmation of A241 × C995 *de novo* hybrids.** (A) ITS-PCR and *HaeIII* digestion. (B) PCR using *S. cerevisiae*- and *S. uvarum*-specific primers. (C) PCR of the mitochondrial gene *COX2*, followed by *HaeIII* digestion. The lanes are numbered as follows: A: A241, C: C995, M: Muri, 3: 3B, 4: 4B, 6: 6A, 13: 13C. A 100 bp ladder was used.

**Supplementary Table S1** – Median sequencing coverage of reads from the Muri hybrid in 10kb windows aligned to the mitochondrial DNA (mtDNA) of *S. cerevisiae* (NCBI-GenBank: NC\_001224), *S. eubayanus* (NCBI-GenBank: NW\_017264706), and *S. uvarum* (NCBI-GenBank: KX657742).

| <b>Reference mtDNA</b>     | <b>Start position</b> | <b>End position</b> | <b>Median coverage</b> |
|----------------------------|-----------------------|---------------------|------------------------|
| <i>S. cerevisiae</i> S288c | 0                     | 10000               | 37                     |
|                            | 10000                 | 20000               | 40                     |
|                            | 20000                 | 30000               | 19638                  |
|                            | 30000                 | 40000               | 40                     |
|                            | 40000                 | 50000               | 40                     |
|                            | 50000                 | 60000               | 2                      |
|                            | 60000                 | 70000               | 15                     |
|                            | 70000                 | 80000               | 4                      |
|                            | 80000                 | 85779               | 5                      |
| <i>S. eubayanus</i> FM1318 | 0                     | 10000               | 49                     |
|                            | 10000                 | 20000               | 690                    |
|                            | 20000                 | 30000               | 8                      |
|                            | 30000                 | 40000               | 7                      |
|                            | 40000                 | 50000               | 5                      |
|                            | 50000                 | 60000               | 39                     |
|                            | 60000                 | 63999               | 46                     |
| <i>S. uvarum</i> CBS395    | 0                     | 10000               | 15197                  |
|                            | 10000                 | 20000               | 15545                  |
|                            | 20000                 | 30000               | 17114                  |
|                            | 30000                 | 40000               | 15616                  |
|                            | 40000                 | 50000               | 14490                  |
|                            | 50000                 | 60000               | 14280                  |
|                            | 60000                 | 64779               | 16883                  |

**Supplementary Table S2** – Euclidean distance matrix between the strains in the principal component analysis of the dataset with 34 brewing-relevant phenotypic traits (Figure 6).

|             | <b>C995</b> | <b>Muri</b> | <b>3B</b> | <b>4B</b> | <b>6A</b> | <b>13C</b> |
|-------------|-------------|-------------|-----------|-----------|-----------|------------|
| <b>A241</b> | 10.83       | 6.38        | 8.66      | 7.82      | 8.33      | 8.35       |
| <b>C995</b> |             | 8.33        | 5.44      | 5.53      | 5.68      | 6.91       |
| <b>Muri</b> |             |             | 5.81      | 5.23      | 6.05      | 5.75       |
| <b>3B</b>   |             |             |           | 3.05      | 3.52      | 4.99       |
| <b>4B</b>   |             |             |           |           | 1.69      | 4.48       |
| <b>6A</b>   |             |             |           |           |           | 4.53       |

**Supplementary Table S3** – Significantly enriched ( $p < 0.05$ ) gene ontology (GO) terms in lists of genes affected by unique missense or nonsense mutations in Muri (*S. cerevisiae* sub-genome) and A241 (Beer059). Analysis was performed using YeastMine (<http://yeastmine.yeastgenome.org>).  $p$ -values are corrected with the Holm-Bonferroni method.

| <b>Muri (<i>S. cerevisiae</i> sub-genome)</b>   |                       |                        |
|-------------------------------------------------|-----------------------|------------------------|
| <b>GO Term</b>                                  | <b><i>p</i>-Value</b> | <b>Number of genes</b> |
| biological regulation [GO:0065007]              | 1.202050e-6           | 544                    |
| regulation of cellular process [GO:0050794]     | 5.057595e-4           | 423                    |
| regulation of biological process [GO:0050789]   | 6.117187e-4           | 448                    |
| regulation of response to stimulus [GO:0048583] | 0.001424              | 67                     |
| response to stimulus [GO:0050896]               | 0.006898              | 339                    |
| <b>A241 (Beer059)</b>                           |                       |                        |
| <b>GO Term</b>                                  | <b><i>p</i>-Value</b> | <b>Number of genes</b> |
| response to stimulus [GO:0050896]               | 0.010846              | 298                    |
| response to organic substance [GO:0010033]      | 0.012249              | 78                     |



**Supplementary Table S4** – The concentrations of aroma compounds (mg/L) and calculated weighting factors based on the aroma thresholds (Meilgaard, 1982) in the beers fermented at 12 °C with the *S. cerevisiae*, *S. uvarum* and natural hybrid strains.

|                         | <b>Propanol</b> | <b>2-Me-Propanol</b> | <b>2-Me-Butanol</b> | <b>3-Me-Butanol</b> | <b>3-Me-Butyl acetate</b> | <b>Ethyl acetate</b> | <b>Ethyl hexanoate</b> | <b>Ethyl octanoate</b> |
|-------------------------|-----------------|----------------------|---------------------|---------------------|---------------------------|----------------------|------------------------|------------------------|
| <b>A240</b>             | 16.64           | 11.05                | 12.08               | 49.02               | 0.39                      | 16.89                | 0.12                   | 0.08                   |
| <b>A241</b>             | 16.06           | 11.50                | 13.37               | 37.98               | 0.55                      | 23.97                | 0.19                   | 0.09                   |
| <b>A242</b>             | 12.90           | 13.42                | 13.65               | 40.29               | 0.55                      | 18.27                | 0.16                   | 0.12                   |
| <b>A243</b>             | 15.17           | 13.11                | 14.13               | 45.30               | 0.56                      | 25.43                | 0.12                   | 0.08                   |
| <b>C992</b>             | 8.76            | 6.70                 | 8.97                | 22.69               | 0.12                      | 8.73                 | 0.05                   | 0.00                   |
| <b>C993</b>             | 9.86            | 10.31                | 12.01               | 23.39               | 0.14                      | 14.93                | 0.05                   | 0.00                   |
| <b>C995</b>             | 11.12           | 9.81                 | 13.06               | 26.26               | 0.17                      | 11.91                | 0.08                   | 0.00                   |
| <b>C996</b>             | 21.42           | 28.69                | 24.84               | 57.35               | 0.61                      | 25.17                | 0.14                   | 0.05                   |
| <b>C997</b>             | 7.21            | 4.77                 | 5.59                | 15.33               | 0.06                      | 2.76                 | 0.00                   | 0.19                   |
| <b>C998</b>             | 13.40           | 13.95                | 16.62               | 40.28               | 0.35                      | 27.73                | 0.06                   | 0.08                   |
| <b>Muri</b>             | 12.17           | 11.68                | 13.72               | 32.19               | 0.64                      | 32.58                | 0.17                   | 0.04                   |
| <b>Mean value</b>       | 13.15           | 12.27                | 13.46               | 35.46               | 0.38                      | 18.94                | 0.10                   | 0.07                   |
| <b>Threshold</b>        | 800             | 200                  | 65                  | 70                  | 1.2                       | 30                   | 0.21                   | 0.9                    |
| <b>Weighting factor</b> | 0.016           | 0.061                | 0.207               | 0.507               | 0.313                     | 0.631                | 0.485                  | 0.075                  |

**Supplementary Table S5** – The concentrations of aroma compounds (mg/L) and calculated weighting factors based on the aroma thresholds (Meilgaard, 1982) in the beers fermented at 20 °C with the *S. cerevisiae*, *S. uvarum* and natural hybrid strains.

|                         | <b>Propanol</b> | <b>2-Me-Propanol</b> | <b>2-Me-Butanol</b> | <b>3-Me-Butanol</b> | <b>3-Me-Butyl acetate</b> | <b>Ethyl acetate</b> | <b>Ethyl hexanoate</b> | <b>Ethyl octanoate</b> | <b>Ethyl decanoate</b> | <b>2-Phenylethanol</b> |
|-------------------------|-----------------|----------------------|---------------------|---------------------|---------------------------|----------------------|------------------------|------------------------|------------------------|------------------------|
| <b>A240</b>             | 27.81           | 24.88                | 23.71               | 74.26               | 1.63                      | 39.30                | 0.42                   | 0.42                   | 0.08                   | 23.64                  |
| <b>A241</b>             | 21.23           | 18.08                | 21.29               | 59.39               | 1.92                      | 53.01                | 0.34                   | 0.35                   | 0.12                   | 14.27                  |
| <b>A242</b>             | 18.56           | 23.03                | 22.33               | 50.53               | 1.43                      | 41.19                | 0.44                   | 0.47                   | 0.11                   | 15.46                  |
| <b>A243</b>             | 18.59           | 23.78                | 23.35               | 59.14               | 1.73                      | 45.12                | 0.41                   | 0.40                   | 0.06                   | 18.67                  |
| <b>C992</b>             | 12.22           | 11.76                | 14.07               | 44.42               | 0.65                      | 20.15                | 0.08                   | 0.00                   | 0.05                   | 15.23                  |
| <b>C993</b>             | 14.24           | 12.41                | 14.30               | 28.54               | 0.38                      | 18.03                | 0.00                   | 0.07                   | 0.10                   | 13.82                  |
| <b>C995</b>             | 14.14           | 13.78                | 15.97               | 43.78               | 0.61                      | 20.79                | 0.10                   | 0.07                   | 0.07                   | 16.08                  |
| <b>C996</b>             | 20.82           | 27.56                | 24.15               | 53.98               | 0.81                      | 26.90                | 0.13                   | 0.23                   | 0.25                   | 24.08                  |
| <b>C997</b>             | 7.83            | 4.69                 | 5.74                | 22.06               | 0.10                      | 3.10                 | 0.08                   | 0.27                   | 0.10                   | 9.71                   |
| <b>C998</b>             | 14.13           | 14.34                | 15.23               | 49.98               | 0.72                      | 21.95                | 0.00                   | 0.13                   | 0.10                   | 29.49                  |
| <b>Muri</b>             | 16.17           | 16.87                | 17.45               | 42.12               | 0.92                      | 40.53                | 0.18                   | 0.21                   | 0.16                   | 20.31                  |
| <b>Mean value</b>       | 16.88           | 17.38                | 17.96               | 48.02               | 0.99                      | 30.00                | 0.20                   | 0.24                   | 0.11                   | 18.25                  |
| <b>Threshold</b>        | 800             | 200                  | 65                  | 70                  | 1.2                       | 30                   | 0.21                   | 0.9                    | 1.5                    | 100                    |
| <b>Weighting factor</b> | 0.021           | 0.087                | 0.276               | 0.686               | 0.826                     | 1.000                | 0.943                  | 0.265                  | 0.073                  | 0.182                  |

**Supplementary Table S6** – The concentrations of aroma compounds (mg/L) and calculated weighting factors based on the aroma thresholds (Meilgaard, 1982) in the beers fermented at 12 °C with Muri, the *de novo* hybrid, and parent strains.

|                         | <b>Propanol</b> | <b>2-Me-Propanol</b> | <b>2-Me-Butanol</b> | <b>3-Me-Butanol</b> | <b>3-Me-Butyl acetate</b> | <b>Ethyl acetate</b> | <b>Ethyl hexanoate</b> |
|-------------------------|-----------------|----------------------|---------------------|---------------------|---------------------------|----------------------|------------------------|
| <b>A241</b>             | 17.39           | 10.95                | 13.20               | 35.87               | 0.49                      | 28.13                | 0.21                   |
| <b>C995</b>             | 9.65            | 8.71                 | 11.16               | 22.29               | 0.20                      | 10.65                | 0.10                   |
| <b>Muri</b>             | 14.43           | 13.14                | 15.36               | 32.22               | 0.38                      | 31.65                | 0.17                   |
| <b>3B</b>               | 10.88           | 8.83                 | 10.05               | 18.87               | 0.11                      | 10.29                | 0.09                   |
| <b>4B</b>               | 12.94           | 11.22                | 12.31               | 26.69               | 0.24                      | 17.39                | 0.06                   |
| <b>6A</b>               | 13.86           | 10.79                | 13.73               | 28.91               | 0.16                      | 10.07                | 0.00                   |
| <b>13C</b>              | 13.14           | 11.35                | 12.21               | 22.12               | 0.16                      | 16.90                | 0.09                   |
| <b>Mean value</b>       | 13.18           | 10.71                | 12.58               | 26.71               | 0.25                      | 17.87                | 0.10                   |
| <b>Threshold</b>        | 800             | 200                  | 65                  | 70                  | 1.2                       | 30                   | 0.21                   |
| <b>Weighting factor</b> | 0.016           | 0.054                | 0.193               | 0.382               | 0.209                     | 0.596                | 0.489                  |

**Supplementary Table S7** – The concentrations of aroma compounds (mg/L) and calculated weighting factors based on the aroma thresholds (Meilgaard, 1982) in the beers fermented at 20 °C with Muri, the *de novo* hybrid, and parent strains.

|                         | <b>Propanol</b> | <b>2-Me-Propanol</b> | <b>2-Me-Butanol</b> | <b>3-Me-Butanol</b> | <b>3-Me-Butyl acetate</b> | <b>Ethyl acetate</b> | <b>Ethyl hexanoate</b> | <b>Ethyl octanoate</b> | <b>Ethyl decanoate</b> | <b>2-Phenylethanol</b> |
|-------------------------|-----------------|----------------------|---------------------|---------------------|---------------------------|----------------------|------------------------|------------------------|------------------------|------------------------|
| <b>A241</b>             | 18.80           | 15.57                | 18.62               | 53.45               | 0.94                      | 41.54                | 0.24                   | 0.18                   | 0.07                   | 18.06                  |
| <b>C995</b>             | 15.18           | 15.67                | 17.72               | 46.19               | 0.67                      | 23.41                | 0.06                   | 0.03                   | 0.04                   | 23.30                  |
| <b>Muri</b>             | 17.03           | 16.99                | 17.86               | 42.79               | 0.78                      | 37.77                | 0.20                   | 0.13                   | 0.10                   | 23.38                  |
| <b>3B</b>               | 18.86           | 13.91                | 16.78               | 37.97               | 0.45                      | 24.31                | 0.12                   | 0.12                   | 0.09                   | 21.25                  |
| <b>4B</b>               | 21.34           | 17.74                | 19.95               | 53.77               | 0.86                      | 34.01                | 0.06                   | 0.09                   | 0.09                   | 26.38                  |
| <b>6A</b>               | 24.07           | 20.26                | 23.54               | 56.39               | 1.08                      | 31.38                | 0.07                   | 0.06                   | 0.04                   | 27.01                  |
| <b>13C</b>              | 25.68           | 16.96                | 19.09               | 40.74               | 0.80                      | 37.36                | 0.27                   | 0.11                   | 0.06                   | 19.09                  |
| <b>Mean value</b>       | 20.14           | 16.73                | 19.08               | 47.33               | 0.80                      | 32.83                | 0.15                   | 0.10                   | 0.07                   | 22.64                  |
| <b>Threshold</b>        | 800             | 200                  | 65                  | 70                  | 1.2                       | 30                   | 0.21                   | 0.9                    | 1.5                    | 100                    |
| <b>Weighting factor</b> | 0.025           | 0.084                | 0.294               | 0.676               | 0.665                     | 1.094                | 0.691                  | 0.114                  | 0.046                  | 0.226                  |
